# Supplementary material
Source: Research Square preprint supplement (doi:10.21203/rs.3.rs-8870282/v1)
Supplement: Supplementary file 1 [file d7474104174008628df1e384.docx]

Supplementary

**Final Version of the clinical practice guidelines implementability assessment tool (CPG-IAT): Item Interpretation and Examples**

Each item is rated on a 5-point scale:

① Score 1 - Strongly disagree: assigned when no relevant information is available or when the concept is reported very poorly.

② Scores 2~4 - assigned when the item only partially meets the standards or criteria; the specific score depends on the completeness and quality of reporting. The more standards are met and the stronger the rationale, the higher the score.

③ Score 5 - Strongly agree: assigned when the reporting quality is high and all standards and criteria are fully met.

| **Dimensions** | **Items** | **Example (2022 Guideline on Acute Fatty Liver of Pregnancy)** | |
| --- | --- | --- | --- |
| **Score** | **Rationale for Scoring** |
| **Dimension 1: Methodological Rigor and Transparency** | - 1. **Clearly identifies the intended users and target population**   **Explanation:** (1) The guideline must specify intended users so readers can determine its applicability. (2) The target population should be clearly described, including age range, sex, clinical types, and comorbidities.  **Example:** The “low back pain guideline” specifies target users (general practitioners, neurologists, orthopedic surgeons, rheumatologists, and physiotherapists). The “diabetes management guideline” limits its population to non-insulin-dependent patients without cardiovascular comorbidities.  **Section to check:** Abstract or text. | 2 | Section 1 (4) identifies “clinicians” as users but does not specify departments. Target population lacks age range and comorbidity information. |
|  | **1-2.** **Clearly describes the criteria for evidence selection**  **Explanation:** The inclusion and exclusion criteria for evidence should be clearly specified, along with reasons for inclusion or exclusion.  **Example:** The authors may decide to include only randomized controlled trials and exclude non-English publications.  **Section to check:** Text or appendix. | 3 | Evidence selection criteria mentioned but incomplete PICO description. |
|  | **1-3. Evidence has been systematically searched**  **Explanation:** The guideline should provide a detailed search strategy, including search terms, information sources, and time frames. Information sources may include electronic databases (e.g., MEDLINE, EMBASE, CINAHL), systematic review databases (e.g., Cochrane Library, DARE), hand-searched journals, conference proceedings, and other guideline repositories (e.g., the US National Guideline Clearinghouse, German Guidelines Clearinghouse). The strategy should be transparent, replicable, and minimize bias.  **Example:** The strategy should specify: ①Major databases searched (e.g., MEDLINE, EMBASE, PsycINFO, CINAHL); ②Search time frame (e.g., January 1, 2004 - March 31, 2008); ③Search terms (e.g., subject headings, subheadings, indexing terms); ④Complete strategy, often included as an appendix.  **Section to check:** Text or appendix. | 3 | Information sources and time range included, but search terms missing. |
|  | **1-4. Mentions plans or processes for guideline updating**  **Explanation:** Guidelines should reflect current evidence and specify their update schedule.  **Example:** Provide a defined interval for updates.  **Section to check:** Text. | 5 | Steps for updating the guideline are described in detail. |
|  | **1-5. Provides a detailed description of the process used to develop recommendations**  **Explanation:** The process of forming recommendations should be described in detail, including how final decisions were reached.  **Example:** Various methods can be used - such as voting, informal consensus, or formal consensus conferences (e.g., Delphi method, Glaser method). Controversial issues and their resolution should be clearly explained. Descriptions should include: ①Process: Steps of the modified Delphi method or voting procedures. ②Results: The level of consensus achieved (e.g., agreement percentage). ③Impact: How the recommendation formation process influenced final recommendations (e.g., consistency between Delphi outcomes and final recommendations).  **Section to check:** Text or appendix. | 2 | Delphi and consensus methods mentioned but steps and dispute resolution not specified. |
|  | **1-6. Discloses key steps in the guideline development process**  **Explanation:** ①The guideline should clearly outline key development stages, such as defining clinical questions, forming recommendations, and conducting external reviews, so readers can understand the full process. ②Detailed information should be provided for each stage, including participants, timeframe, and methods, to enhance transparency and credibility. ③The approach to gathering and integrating feedback at each stage should be specified to ensure scientific rigor and practical relevance.  **Example:** ①“At the expert meeting in January 2023, clinical questions regarding glycemic management in diabetic patients - such as ‘How to select appropriate insulin regimens?’ - were determined through discussion.” ②“Recommendations were developed based on a systematic review of literature from 2010 to 2022, using the GRADE framework to assess evidence quality and recommendation strength.” ③“After forming recommendations, 10 external experts were invited to review them. Their feedback, collected in May 2023, was used to revise the recommendations.” ④“During the external review phase, feedback from various medical institutions was gathered and summarized in June 2023 to ensure applicability across diverse clinical settings.”  **Section to check:** Abstract and text. | 4 | Clinical questions, evidence, and recommendation processes disclosed; external review missing. |
| **Dimension 2: Recommendation Clarity and Interpretability** | **2-1. Recommendations in the guideline text are clearly identifiable**  **Explanation:** Recommendations should be highlighted with consistent labeling or formatting.  **Example:** Use of distinctive visual identifiers - such as special fonts, bold text, colors, or icons - helps make recommendations easily recognizable within the guideline.  **Section to check:** Text. | 5 | Recommendations are bolded and numbered (“1-1, 1-2, 1-3”). |
|  | **2-2.** **There is a clear linkage between recommendations and supporting evidence**  **Explanation:** Each recommendation should have an explicit evidence base or indicate expert consensus when evidence is limited.  **Example:** According to recent systematic reviews, the use of metformin effectively reduces HbA1c levels in patients with type 2 diabetes.  **Section to check:** Text. | 5 | Clear linkage between each recommendation and supporting evidence. |
|  | **2-3. Provides the quality of evidence and strength of recommendation for each item**  **Explanation:** Evidence quality and recommendation strength (e.g., strong/weak) should be stated.  **Example:** “High-risk obstetric screening at 35-37 weeks (GRADE: 1C).” [1 indicates a strong recommendation; C indicates low-quality evidence].  **Section to check:** Text. | 5 | Evidence quality and recommendation strength are reported for all recommendations. |
|  | **2-4. The wording of recommendations is clear and concise**  **Explanation:** ①Determine whether the recommendations use clear and concise language, avoiding overly complex terminology or long sentences to ensure readability. ②Avoid vague or ambiguous statements, ensuring each recommendation is straightforward and actionable.  **Example:** ①Use “It is recommended to monitor blood glucose daily” instead of “It is recommended to perform the behavior of blood glucose monitoring.” ②Clearly state “For patients with hyperglycemia, consider pharmacological treatment” instead of “Patients may require some form of intervention.” ③State “For patients with acute pain, administer nonsteroidal anti-inflammatory drugs (NSAIDs)” instead of “Consider some medications for pain relief.” ④Use “For patients with chronic obstructive pulmonary disease, regular pulmonary function testing is recommended” instead of “Some tests should be considered for patients with respiratory problems.” ⑤Use “For patients with chronic obstructive pulmonary disease, regular pulmonary function testing is recommended” instead of “Some tests should be considered for patients with respiratory problems.” ⑥Using “hypertension” rather than “the state of elevated blood pressure” improves readability by avoiding unnecessary jargon.  **Section to check:** Recommendations section. | 5 | Language is simple, clear, and easy to follow. |
|  | **2-5. The content is complete and logically organized**  **Explanation:** Information should be comprehensive and well-structured for ease of understanding and application.  **Example:** ①Overall completeness: The full guideline should include key components such as clinical questions, evidence, consensus methods, and recommendations. ②Completeness of clinical questions: The guideline should specify which clinical problems it addresses, describe how they were identified (e.g., through literature review, user surveys, or expert consultation), outline the selection process, and present them in PICO format. ③Completeness of evidence: Major recommendations should include explicit references, describe systematic evidence retrieval, specify inclusion/exclusion criteria, assess risk of bias or methodological quality, summarize evidence results, explain grading criteria, and provide evidence summary tables or graded evidence that can be traced to full systematic reviews. Gaps in evidence and future research directions should also be stated. ④Completeness of recommendations: Each recommendation should include its strength, rationale or explanation, and notes on implementation considerations.  **Section to check:** Abstract and text. | 5 | Guideline is complete and logically structured. |
|  | **2-6. The layout is well-designed and facilitates quick reference and use**  **Explanation:** Information should be logically organized so that key content stands out and can be quickly located and applied.  **Example:** Recommendations presented in lists or numbered formats make guidance clear and easy to navigate.  **Section to check:** Abstract and text. | 5 | Layout is clear and user-friendly. |
| **Dimension 3: Clinical Relevance** | **3-1. Clearly defines the specific clinical questions**  **Explanation:** The guideline should specify the clinical questions it addresses, avoiding ambiguity.  **Example:** “How to optimize glycemic control in type 2 diabetes patients?”  **Section to check:** Abstract or text. | 5 | Both abstract and text define the clinical questions, covering diagnosis and treatment of acute fatty liver of pregnancy (AFLP). |
|  | **3-2. Recommendations adequately address the clinical questions**  **Explanation:** Recommendations should directly correspond to the questions, consider various patient contexts, and acknowledge evidence gaps.  **Example:** A diabetes guideline includes diet, exercise, medication, and education strategies.  **Section to check:** Recommendation section. | 5 | Each recommendation directly answers the clinical question, specifying screening time and indicators. |
| **Dimension 4: Actionability** | **4-1. Recommendations provide practical steps for application**  **Explanation:** Recommendations should be actionable, specifying implementation steps.  **Example:** “Monitor blood glucose daily and record results.”  **Section to check:** Recommendations, interpretation, or evidence summary. | 5 | Recommendation 2 provides diagnostic criteria and supplementary notes. |
|  | **4-2. The guideline specifies the implementation settings or applicable contexts**  **Explanation:** Recommendations should specify applicable patient types, clinical settings, or health system contexts.  **Example:** ①Patient type: For instance, if the recommendation states “For elderly diabetic patients, simplified treatment regimens should be prioritized to minimize adverse effects,” this emphasizes the importance of patient characteristics in the implementation context. ②Clinical setting: If the guideline states “During inpatient treatment of cancer patients, nutritional status should be assessed regularly and individualized nutrition support should be provided,” it highlights the link between specific clinical settings and the recommendations. ③Health system characteristics: If a recommendation notes that “In large urban hospitals, due to high patient turnover, detailed follow-up information should be provided upon discharge,” it reflects how system features influence implementation. ④Technology availability: If the guideline mentions “When managing chronic diseases via telemedicine, consider patients’ technological literacy and equipment availability,” it underlines the importance of technical factors in implementation contexts.  **Section to check:** Text. | 5 | For clinical question 2, the recommendation “For pregnant women suspected of having AFLP who do not meet the Swansea diagnostic criteria, repeat liver and coagulation tests promptly” illustrates the significance of patient characteristics within implementation contexts. |
